# Supplementary material for: Simple fluorescence-based detection of Cr(iii) and Cr(vi) using unmodified gold nanoparticles
Source: Royal Society of Chemistry journal article supplement (doi:10.1039/c4ay01978d), 2014-01-01
Supplement: c4ay01978d1.pdf [file c4ay01978d1.pdf]

# Simple fluorescence-based detection of Cr (III) and Cr (VI) using unmodified Gold Nanoparticles

Elavarasi M, Sruthi Ann Alex, N. Chandrasekaran, and Amitava Mukherjee

Centre for Nanobiotechnology, VIT University, Vellore, India

**\*Corresponding author**

**Dr. Amitava Mukherjee**

**Senior Professor & Deputy Director**

**Centre for Nanobiotechnology**

**VIT University, Vellore - 632014**

**Email: [amit.mookerjea@gmail.com](mailto:amit.mookerjea@gmail.com)**

**Phone: 91 416 2202620**

**Fax: 91-416-2243092**

**RESULTS:**

**Figure S1. Visual photograph of color change when various concentrations ( $10^{-7}$ - $10^{-3}$  M) of Cr (III) were added to Au NPs**

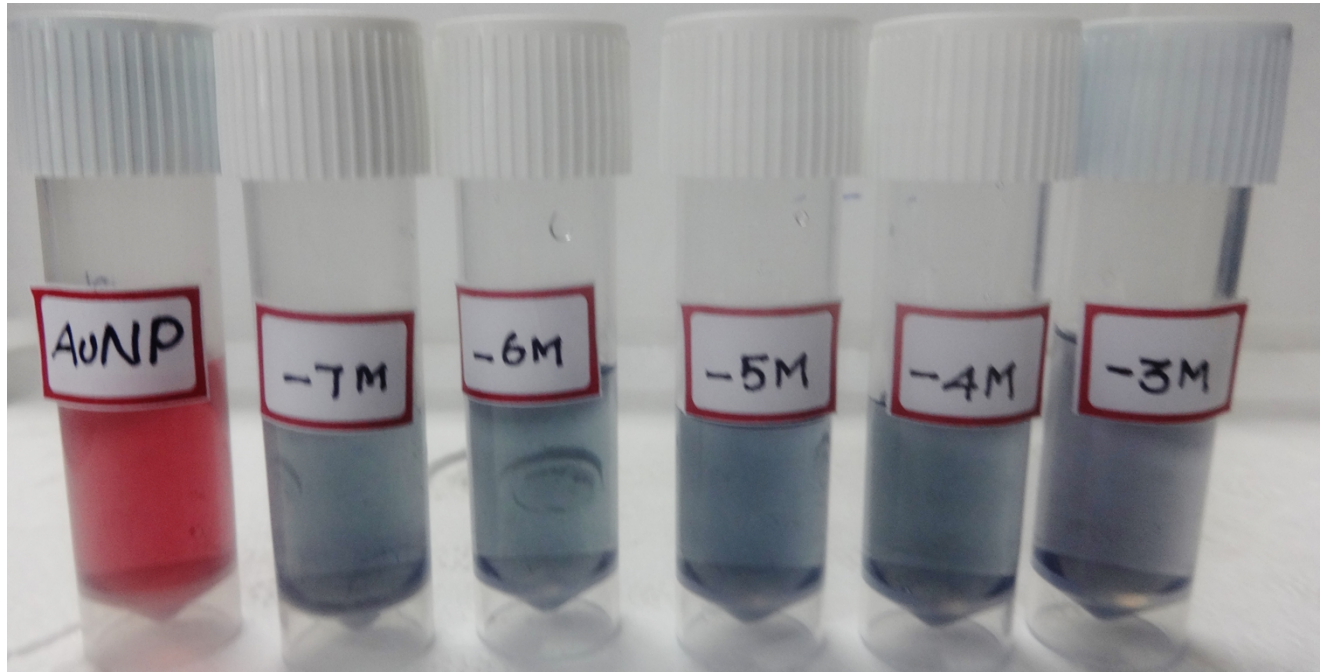

**Table S1. The volume ratio of Au NP and Cr (III) was determined by using different range of volume ratios [range:  $10^{-3}$  M -  $10^{-7}$  M]**

| Volume of Au NP ( $\mu$ l) | Volume of Cr(III) ( $\mu$ l) | AuNP/Cr(III) volume ratio | Different Cr (III) concentrations |             |             |             |             |
|----------------------------|------------------------------|---------------------------|-----------------------------------|-------------|-------------|-------------|-------------|
|                            |                              |                           | $10^{-7}$ M                       | $10^{-6}$ M | $10^{-5}$ M | $10^{-4}$ M | $10^{-3}$ M |
| 700                        | 200                          | 3.5:1                     | 253                               | 436         | 344         | 543         | 234         |
| 700                        | 300                          | 2.3:1                     | 710                               | 659         | 582         | 477         | 382         |
| 700                        | 500                          | 1.4:1                     | 326                               | 262         | 182         | 137         | 428         |

**Table S2. The fluorescence intensity measured at a range of Cr (III) concentrations [range:  $10^{-3}$  M -  $10^{-7}$  M] at different pH**

| pH | Different Cr (III) concentrations |                    |                    |                    |                    |
|----|-----------------------------------|--------------------|--------------------|--------------------|--------------------|
|    | 10 <sup>-7</sup> M                | 10 <sup>-6</sup> M | 10 <sup>-5</sup> M | 10 <sup>-4</sup> M | 10 <sup>-3</sup> M |
| 3  | 710                               | 659                | 582                | 477                | 382                |
| 4  | 524                               | 273                | 541                | 652                | 752                |
| 5  | 361                               | 614                | 482                | 731                | 384                |

**Table S3. The comparison of Cr concentration observed by the current method to that measured by AAS for tap water and Lake water**

| Source     | Fluorescences Intensity | Chromium concentration range (ppb) | Chromium concentrations by AAS (ppb) |
|------------|-------------------------|------------------------------------|--------------------------------------|
| Tap water  | 562                     | 500-50                             | 187±1                                |
| Lake water | 523                     | 500-50                             | 125.±1                               |
